# Supplementary material for: Synthesis of TiO2/rGO composites with different morphologies and their electrocatalysis for the oxygen reduction reaction
Source: Royal Society of Chemistry journal article supplement (doi:10.1039/c8nj04559c), 2018-01-01
Supplement: c8nj04559c1.pdf [file c8nj04559c1.pdf]

## Electronic Supplementary Information for:

# Synthesis of $\text{TiO}_2/\text{rGO}$ Composites with Different Morphologies and Their Electrocatalysis for Oxygen Reduction Reaction

Yi Zhang, Xiaofeng Zhang, Huodi Huang, Jiannan Cai, Baohua Huang and Shen Lin\*

College of Chemistry and Materials Science, Fujian Normal University, Fuzhou, Fujian, China, 350007

E-mail: shenlin@fjnu.edu.cn (S. Lin); Tel./Fax: +86-591-22867399

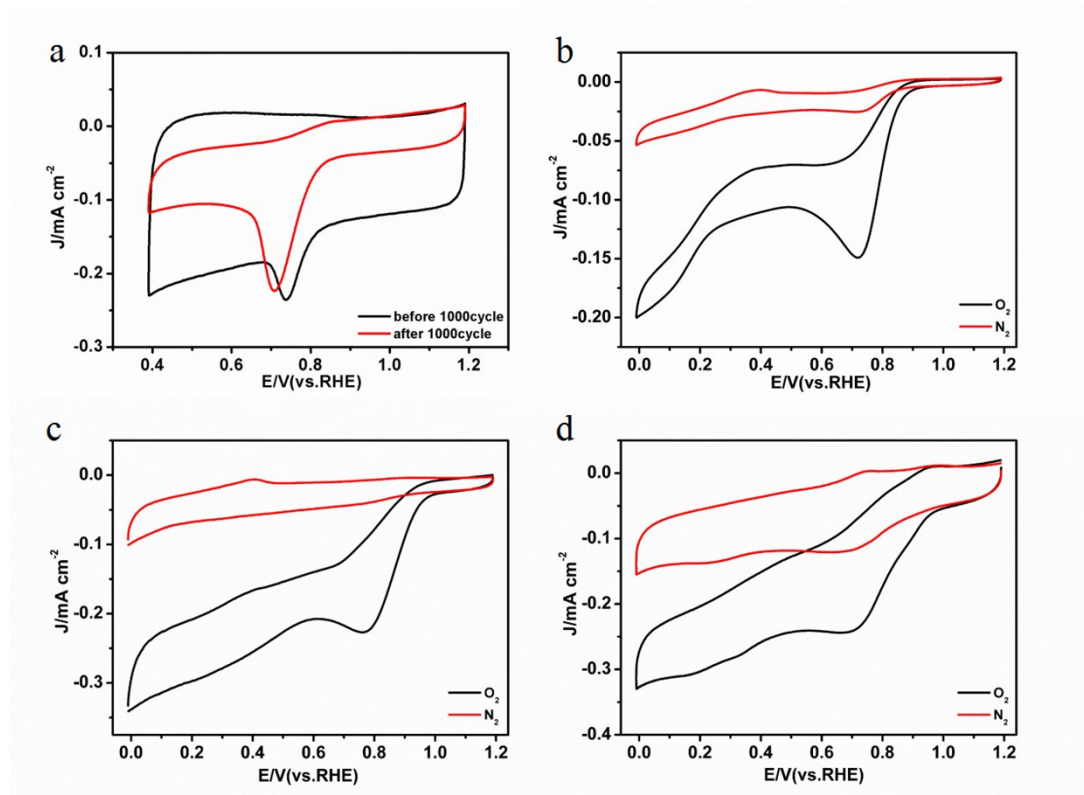

Figure S1. The CV curves of rGO (a),  $\text{TiO}_2$  (b),  $\text{TiO}_2/\text{rGO}$  (truncated octahedral) (c), and  $\text{TiO}_2/\text{rGO}$  (elliptical) (d) in  $\text{N}_2$  and  $\text{O}_2$ -saturated 0.1 M KOH solution at scanning rate of 10 mV s<sup>-1</sup>.

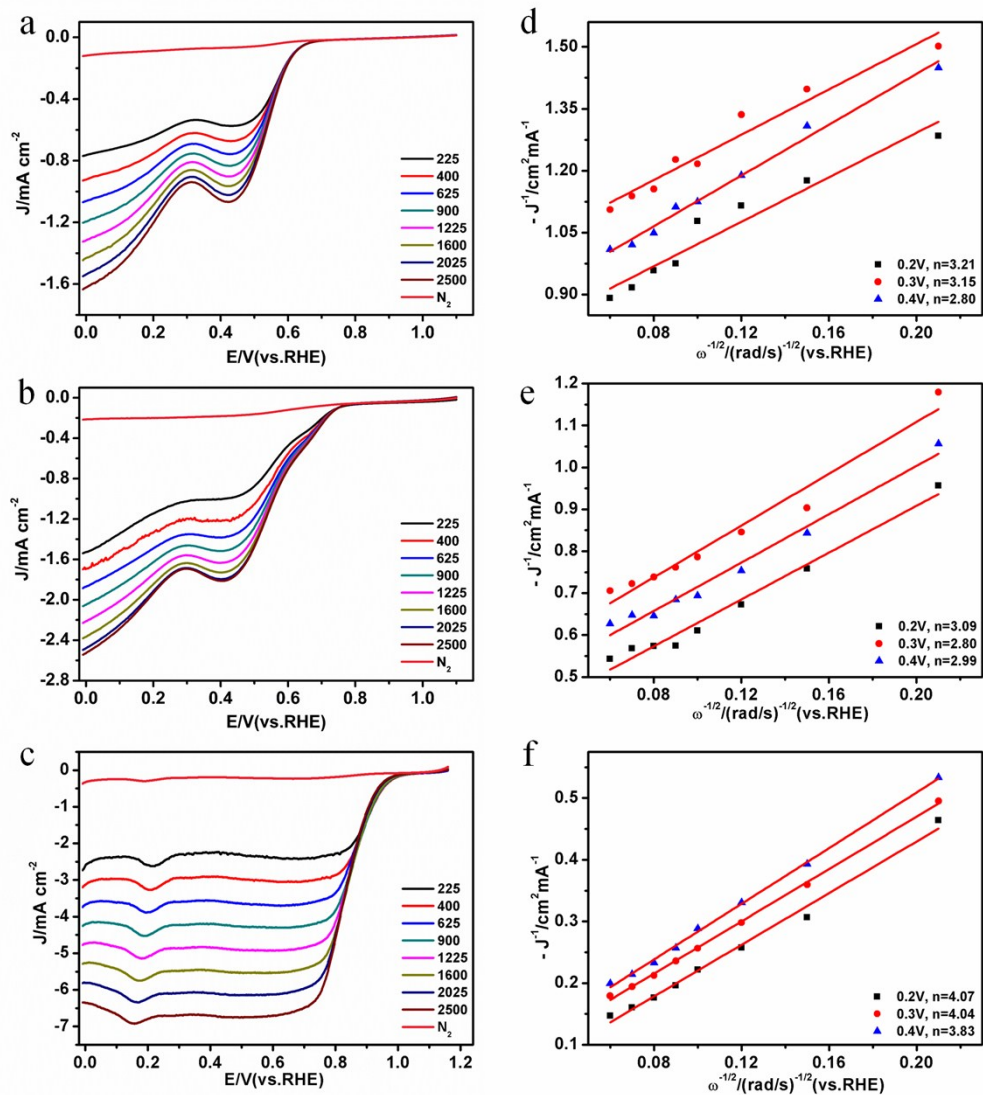

Figure S2. LSV curves of (a) TiO<sub>2</sub>, (b) rGO, and (c) Pt/C in O<sub>2</sub> saturated 0.1 M KOH solution with various rotation rates at a scan rate of 10 mV s<sup>-1</sup>; Koutecky-Levich plots for (d) TiO<sub>2</sub>, (e) rGO, and (f) Pt/C at different electrode potentials.

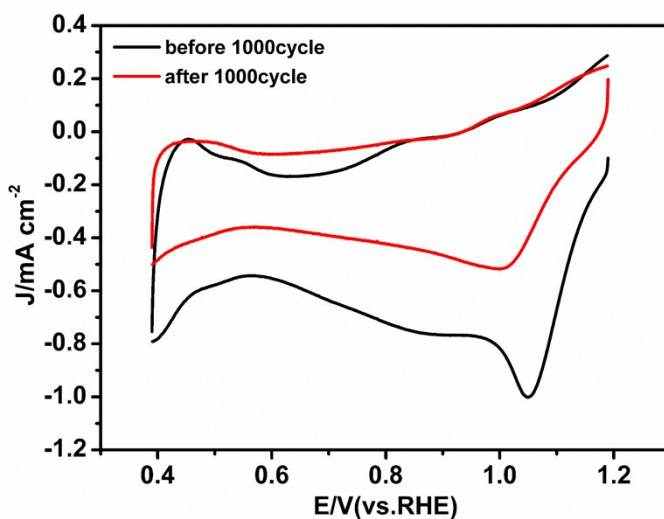

Figure S3. The CV curves of Pt/C in O<sub>2</sub>-saturated 0.1 M KOH solution (scanning rate:20 mV s<sup>-1</sup>) under 1000 cycle.

**Table S1.** Physical parameters of different catalysts in O<sub>2</sub> saturated 0.1 M KOH at 1600 rpm<sup>a</sup>

| Materials             | morphology           | Onset/V <sup>b</sup> | J/mA cm <sup>-2</sup> | n    | Ref. <sup>c</sup> |
|-----------------------|----------------------|----------------------|-----------------------|------|-------------------|
| TiO <sub>2</sub> /rGO | Octahedral           | 0.85                 | 4.18                  | 3.87 | This work         |
| TiO <sub>2</sub> /rGO | Truncated Octahedral | 0.79                 | 2.47                  | 3.05 | This work         |
| TiO <sub>2</sub> /rGO | Elliptical           | 0.76                 | 2.41                  | 3.06 | This work         |
| TiO <sub>2</sub>      | Octahedral           | 0.68                 | 1.44                  | 3.16 | This work         |
| rGO                   | Amorphous            | 0.75                 | 2.39                  | 2.96 | This work         |
| Pt/C                  | Amorphous            | 0.95                 | 5.19                  | 3.98 | This work         |
| TiO <sub>2</sub> /rGO | Amorphous            | 0.83                 | 4.21                  | 3.98 | Ref. 21           |

<sup>a</sup> All the potential values from references were converted to vs. RHE for comparison.

<sup>b</sup> In order to minimize the effect of residual currents on the potential value, the onset potential in this research has been defined as a potential required for generating an ORR current density of 0.1 mA cm<sup>-2</sup> in the LSV measurement.

<sup>c</sup> Ref. 21 have been cited references in the revised manuscript.

**Table S2.** Peak area percentage of C, O and Ti.

| Elements      | C       | O       | Ti      |
|---------------|---------|---------|---------|
| Peak area (%) | 37.12 % | 44.69 % | 18.19 % |
